# Supplementary material for: No evidence for prolactin’s involvement in the post-ejaculatory refractory period
Source: PubMed Central journal article supplement (PMC7782750; doi:10.1038/s42003-020-01570-4), 2021-01-04
Supplement: 42003_2020_1570_MOESM2_ESM.pdf [file 42003_2020_1570_MOESM2_ESM.pdf]

## Description of Additional Supplementary Files

**File name:** Supplementary Data 1

**Description:** Table with the percentage of males that reached ejaculation in all experiments presented in the paper plus one control experiment with unmanipulated animals.

**File name:** Supplementary Data

**Description:** Additional analysis of the sexual behavior of males pre-treated with vehicle or Domperidone.

**File name:** Supplementary Data 3

**Description:** Analysis of the locomotor activity of bromocriptine treated males.

**File name:** Supplementary Data 4

**Description:** Additional analysis of the sexual behavior of males pre-treated with vehicle or Bromocriptine.
