# Supplementary material for: No evidence for prolactin’s involvement in the post-ejaculatory refractory period
Source: PubMed Central journal article supplement (PMC7782750; doi:10.1038/s42003-020-01570-4), 2021-01-04
Supplement: 42003_2020_1570_MOESM3_ESM.pdf [file 42003_2020_1570_MOESM3_ESM.pdf]

Supplementary Data

**No evidence for prolactin's involvement in the post-ejaculatory refractory period**

**Valente et al.**

**Supplementary Data 1** Percentage of BL6 males that reached ejaculation.

Comparison of the percentage of BL6 males that ejaculated in the different type of experiments: a) PRL monitoring: tail tip blood collection during the trial; b) PRL manipulation: substance injection prior beginning of the trial; c) un-manipulated males.

| <b>Experiment type</b>      |           | <b># males that ejaculated</b> | <b>Total number males</b> | <b>% males that ejaculated</b> |
|-----------------------------|-----------|--------------------------------|---------------------------|--------------------------------|
| a) PRL monitoring           | Fig. 1a-b | 8                              | 23                        | 34.8                           |
| b) PRL manipulation – Veh   | Fig. 2c   | 13                             | 17                        | 76.5                           |
| b) PRL manipulation – Domp  | Fig. 2c   | 11                             | 17                        | 64.7                           |
| b) PRL manipulation – Veh   | Fig. 3c   | 15                             | 18                        | 83.3                           |
| b) PRL manipulation – Bromo | Fig. 3c   | 13                             | 18                        | 72.2                           |
| c) Un-manipulated           | ---       | 6                              | 9                         | 66.7                           |

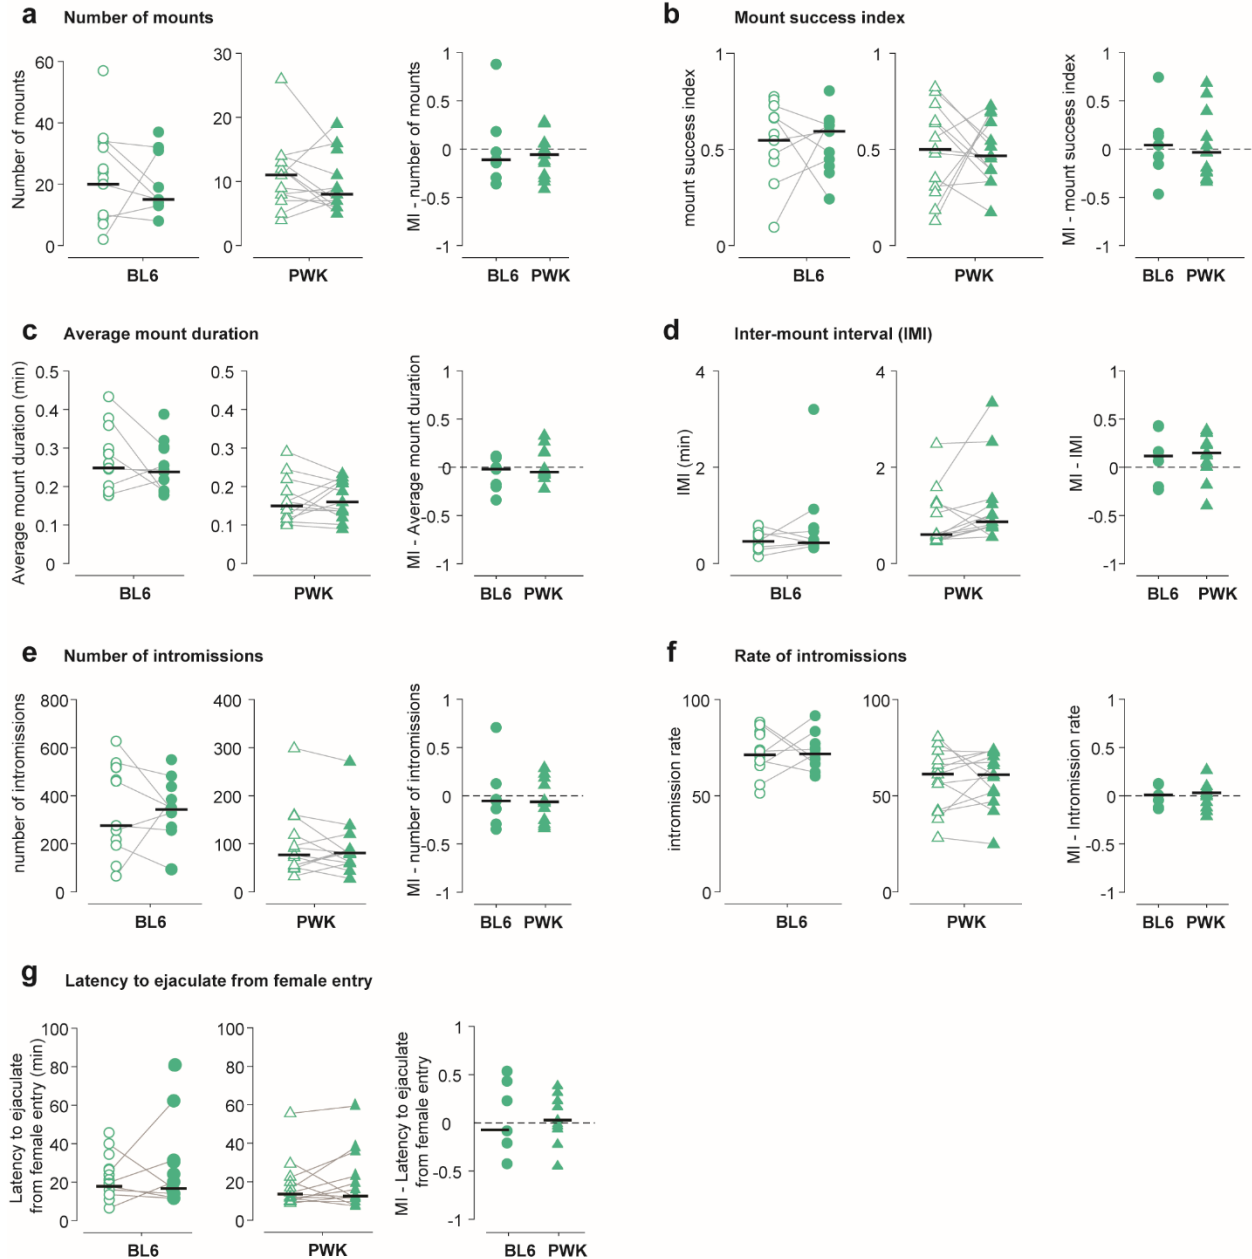

**Supplementary Data 2** Additional analysis of the sexual behavior assay using adult sexually trained BL6 and PWK males pre-treated with vehicle or Domperidone (total number of subjects used: BL6  $n = 17$ ; PWK,  $n = 13$ ; with ejaculation in both sessions BL6  $n = 7$ ; PWK,  $n = 13$ ). Quantification of **a** number of mounts, **b** mount success index [mounts/(mount attempt + mounts)], **c** mount mean duration (total mount duration/#mounts), **d** Inter-mount interval (IMI), **e** number of intromissions, **f** rate of intromissions (#intromissions/total mount duration) and **g** latency to ejaculate from female entry. Each animal underwent two behavioral assays: one with vehicle and one with domperidone. Administration was counterbalanced between animals. Each line represents data of an individual; Unconnected dots represent data of an individual that did not ejaculate in the matching trial (data not used for statistics). MI [modulation index (domp-

veh)/(dom+veh)]. Data presented as median  $\pm$  M.A.D. (median absolute deviation with standard scale factor) following Wilcoxon rank sum test.

**a** Average speed before female entry

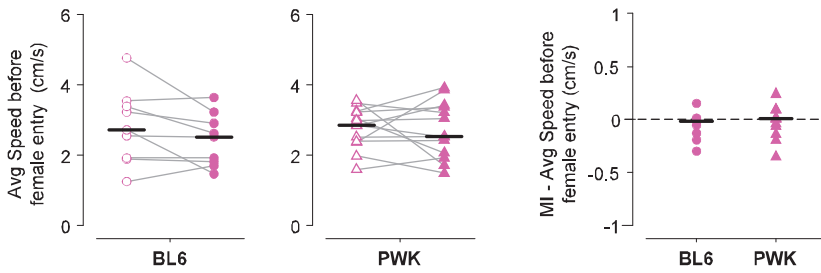

**b** Average speed after female entry

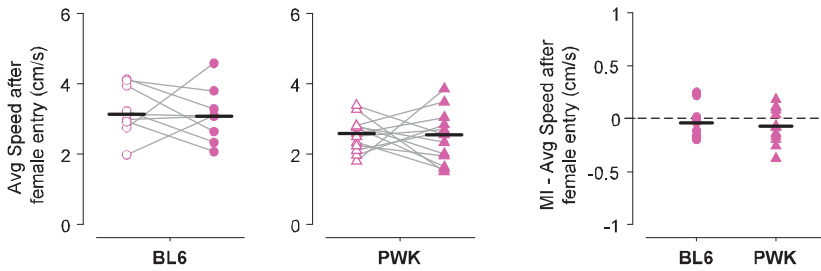

**c** Average male speed projected towards the female

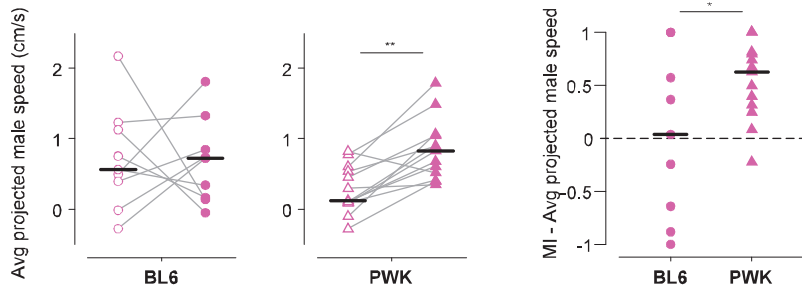

**d** Average distance between the pair

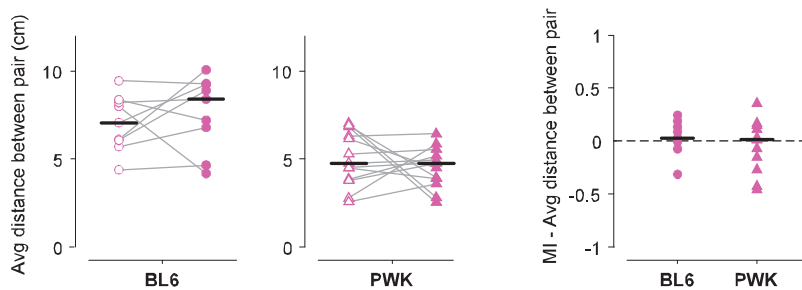

**Supplementary Data 3** Bromocriptine treated animals do not show increased locomotion activity. Average speed of the male **a** before and **b** after the female entry until the first consummatory event. **c** Average male speed projected towards the female **d** average distance between the pair. Metrics were taken from couples that reached ejaculation in both sessions from bromocriptine assay BL6 n= 9, PWK n =13 (Fig. 3). Each line represents data of an individual; MI [modulation index (bromo-veh)/(bromo+veh)]. Data presented as median  $\pm$

M.A.D. (median absolute deviation with standard scale factor) following Wilcoxon rank sum test. Significance was accepted at  $P < 0.05$ . \*  $P < 0.05$ , \*\*  $P < 0.01$ .

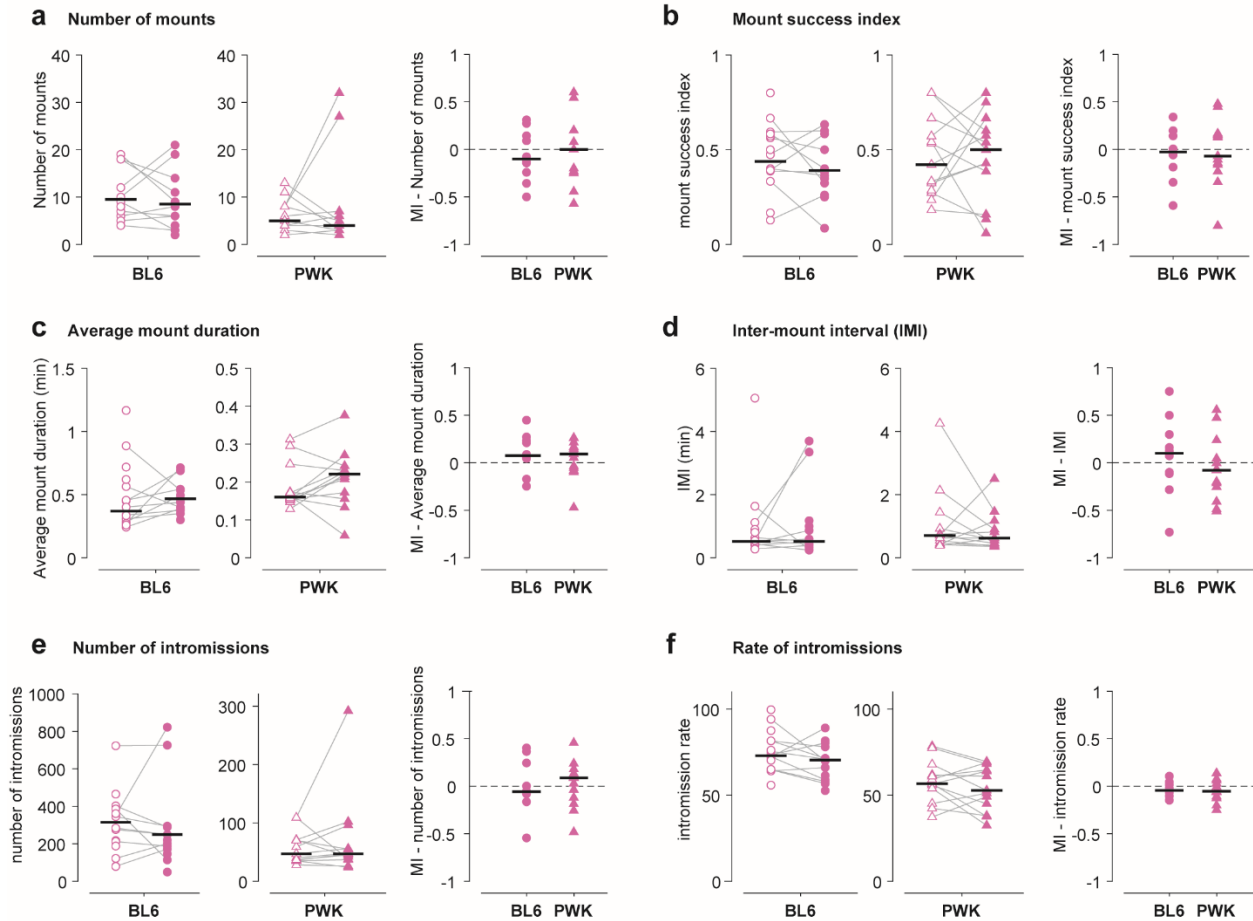

**Supplementary Data 4** Additional analysis of the sexual behavior assay using adult sexually trained BL6 and PWK males pre-treated with vehicle or Bromocriptine (total number of subjects used: BL6  $n = 18$ ; PWK,  $n = 13$ ; with ejaculation in both sessions BL6  $n = 10$ ; PWK,  $n = 13$ ). Quantification of **a** number of mounts, **b** mount success index [mounts/(mount attempt + mounts)], **c** mount mean duration (total mount duration/#mounts), **d** Inter-mount interval (IMI), **e** number of intromissions and **f** rate of intromissions (#intromissions/total mount duration). Each animal underwent two behavioral assays: one with vehicle and one with domperidone. Administrations were contra balanced between animals. Each line represents data of an individual; Unconnected dots represent data of an individual that did not ejaculate in the matching trial (data not used for statistics). MI [modulation index (bromo-veh)/(bromo+veh)]. Data presented as median  $\pm$  M.A.D. (median absolute deviation with standard scale factor) following Wilcoxon rank sum test. Significance was accepted at  $P < 0.05$ .
